# Supplementary material for: Conjugated polycarboxylate ligand-coordinated NiFe LDH for enhanced oxygen evolution
Source: Royal Society of Chemistry journal article supplement (doi:10.1039/d4ta04498c), 2024-01-01
Supplement: d4ta04498c1.pdf [file d4ta04498c1.pdf]

## Supplementary Materials

### Conjugated polycarboxylate ligands-coordinated NiFe LDH for enhanced oxygen evolution

Zi-Ye Liu<sup>a</sup>, Qian-Yu Wang<sup>a</sup>, Teng Xu<sup>a</sup>, Ji-Ming Hu\*<sup>a,b</sup>

<sup>a</sup> Department of Chemistry, Zhejiang University, Hangzhou 310058, P. R. China

<sup>b</sup> Southern Marine Science and Engineering Guangdong Laboratory (Zhuhai), Zhuhai 519080, P.R.  
China

\*: Corresponding author. E-mail: kejmhu@zju.edu.cn. Tel: +86-571-87953297. Fax: +86-571-  
87951895.

## Supplementary datas

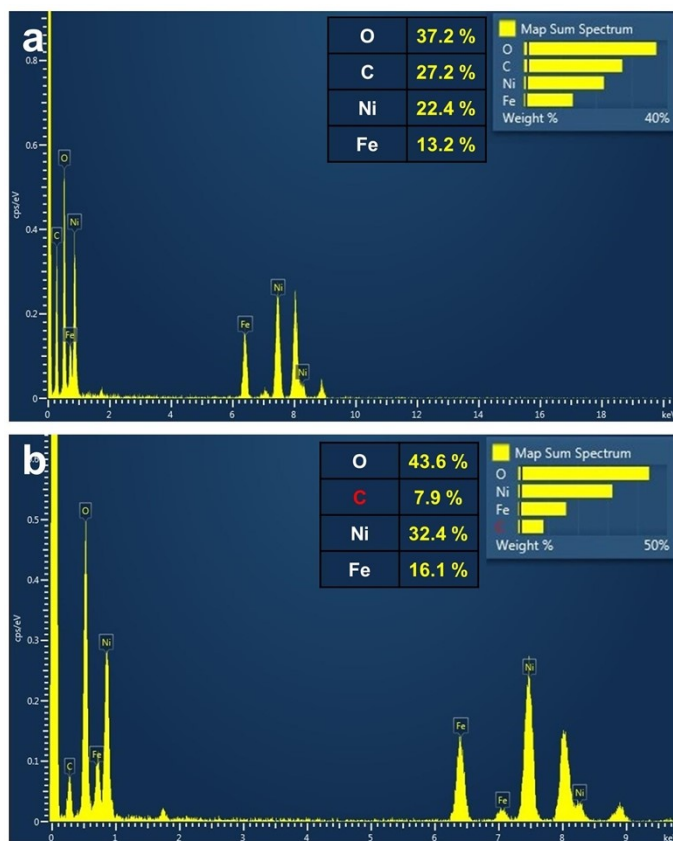

**Figure S1.** EDS results of (a) cp-OA(40) LDH and (b) cp-Ni<sub>2</sub>Fe<sub>1</sub> LDH.

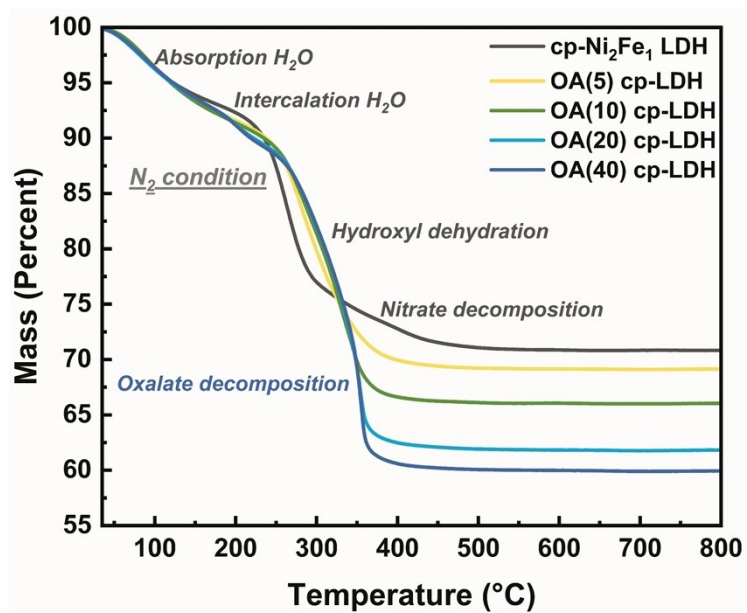

**Figure S2.** Thermogravimetry analysis of cp-Ni<sub>2</sub>Fe<sub>1</sub> LDH and cp-OA(n) NiFe LDH(n= 5, 10, 20, 40) in N<sub>2</sub> condition

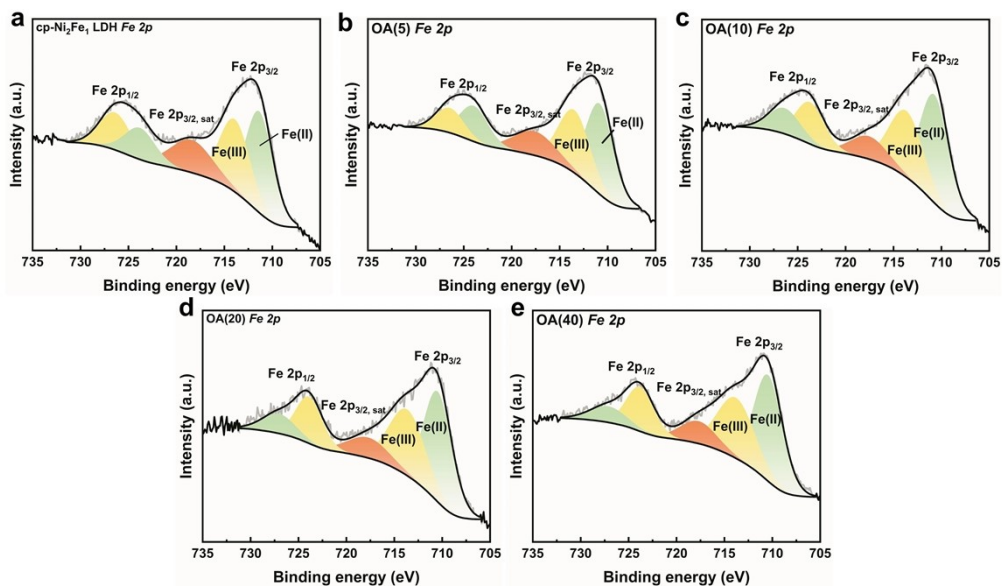

**Figure S3.** Fe 2p XPS peak fitting of cp-Ni<sub>2</sub>Fe<sub>1</sub> LDH and cp-OA(n) NiFe LDH (n= 5, 10, 20, 40).

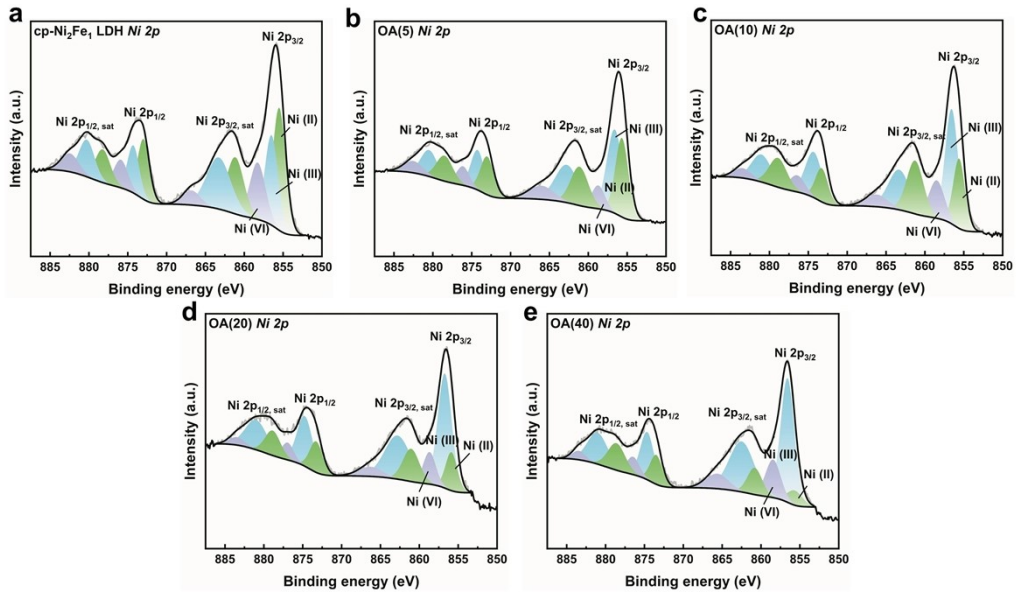

**Figure S4.** Ni 2p XPS peak fitting of cp-Ni<sub>2</sub>Fe<sub>1</sub> LDH and cp-OA(n) NiFe LDH (n= 5, 10, 20, 40).

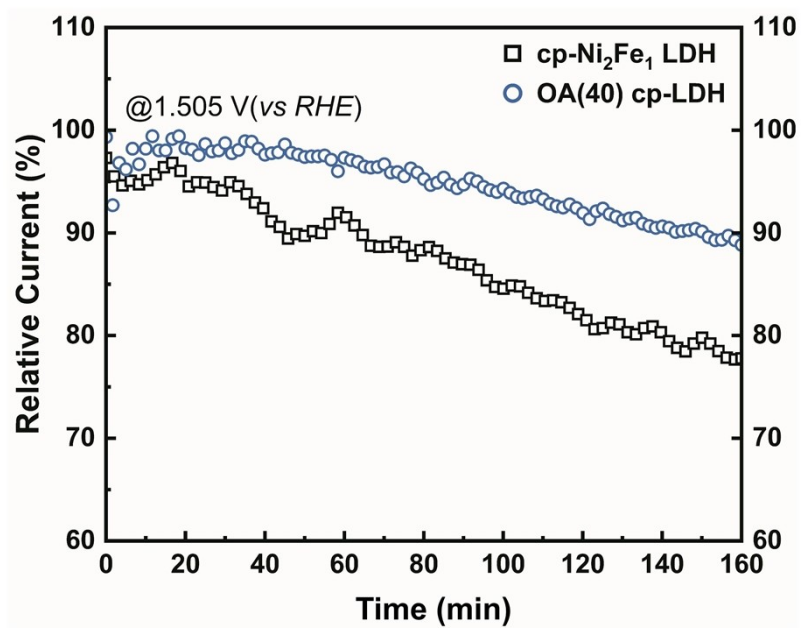

Figure S5. The chronoamperometry tests of cp-Ni<sub>2</sub>Fe<sub>1</sub> LDH and OA(40) cp-LDH at 1.505 V vs RHE.

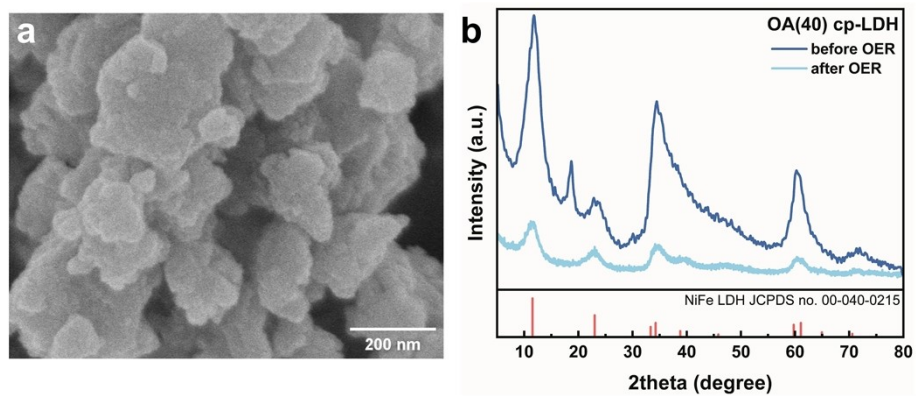

**Figure S6.** (a) SEM image of cp-OA(40) LDH and (b) XRD pattern of cp-OA(40) LDH before and after OER.

Under the oxygen atmosphere, the BTC of MIL-100 is completely burned to CO<sub>2</sub> and H<sub>2</sub>O, and the residual component is Fe<sub>2</sub>O<sub>3</sub>, according to the proportion calculation:

$$m_{(Fe\%wt)} = m_{vestiges} \times \frac{112}{156},$$

the content of Fe in each portion of MIL-100(Fe) is 11.6%, and BTC is 69.3%. So, 1 g of MIL-100(Fe) powder contains 2.07 mmol of Fe.

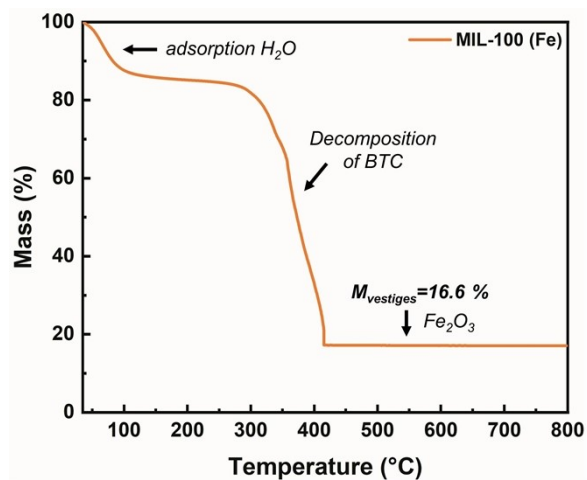

**Figure S7.** Thermogravimetry analysis of MIL-100(Fe)



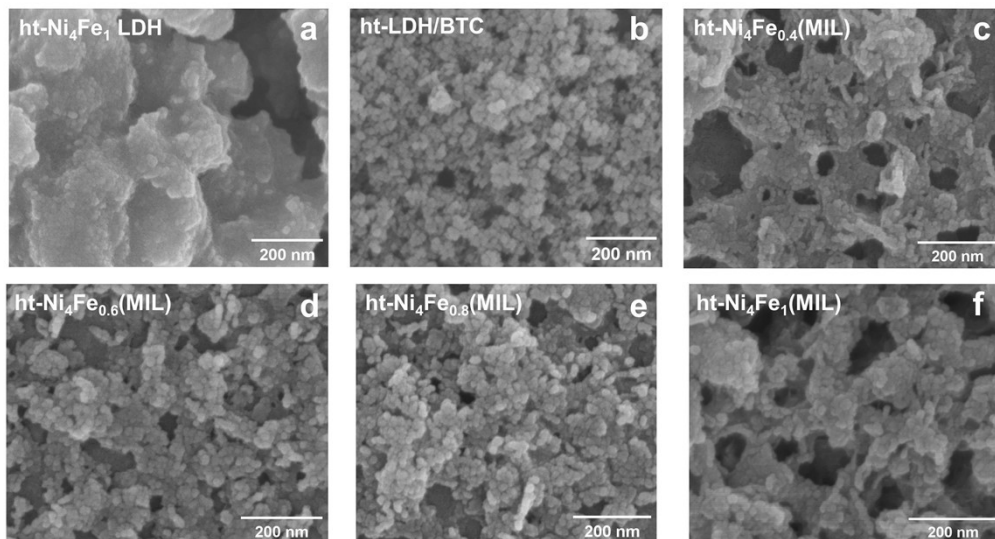

**Figure S8.** SEM images of (a)ht-Ni<sub>4</sub>Fe<sub>1</sub> LDH, (b) ht-LDH/BTC, (c) ht-Ni<sub>4</sub>Fe<sub>0.4</sub>(MIL) (d) ht-Ni<sub>4</sub>Fe<sub>0.6</sub>(MIL), (e) ht-Ni<sub>4</sub>Fe<sub>0.8</sub>(MIL) and (e) ht-Ni<sub>4</sub>Fe<sub>1</sub>(MIL).

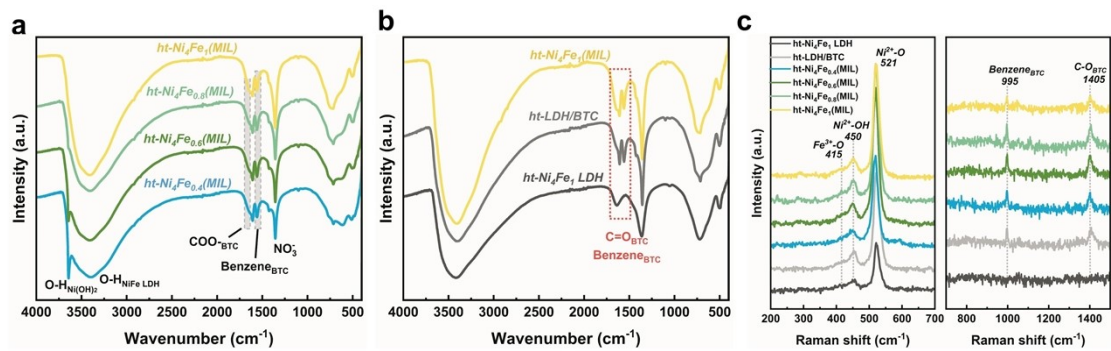

**Figure S9.** (a),(b) FTIR and (c) Raman spectra of ht-Ni<sub>4</sub>Fe<sub>n</sub>(MIL) (n= 0.4, 0.6, 0.8, 1), ht-Ni<sub>4</sub>Fe<sub>1</sub> LDH and ht-LDH/BTC.

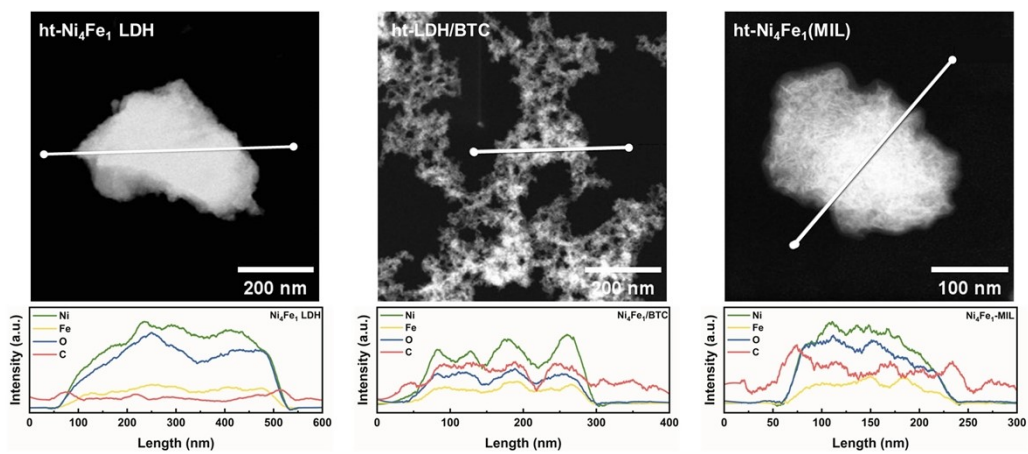

**Figure S10.** HRTEM EDS line-scanning ht-Ni<sub>4</sub>Fe<sub>1</sub>(MIL), ht-Ni<sub>4</sub>Fe<sub>1</sub> LDH and ht-LDH/BTC.

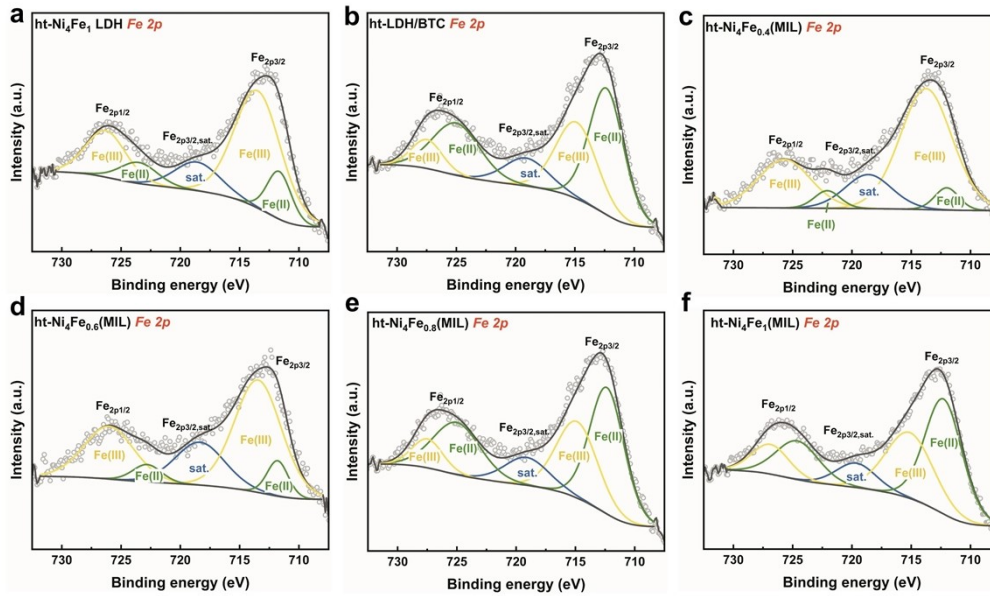

**Figure S11.** Fe 2p XPS peak fitting of ht-Ni<sub>4</sub>Fe<sub>n</sub>(MIL) ( $n = 0.4, 0.6, 0.8, 1$ ), ht-Ni<sub>4</sub>Fe<sub>1</sub> LDH and ht-LDH/BTC.

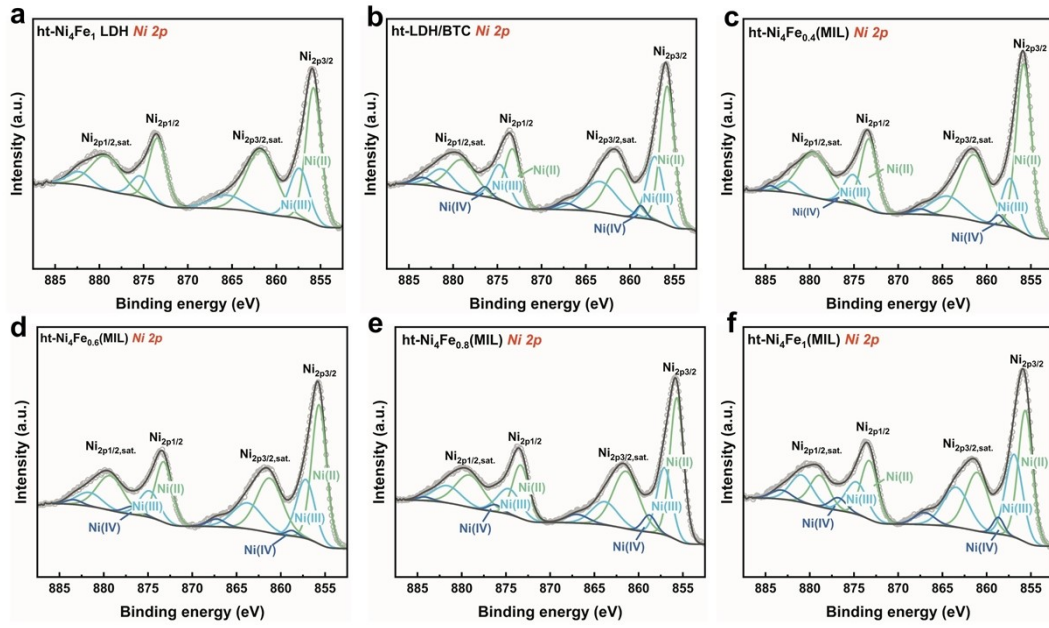

**Figure S12.** Ni 2p XPS peak fitting of ht-Ni<sub>4</sub>Fe<sub>n</sub>(MIL) (n= 0.4, 0.6, 0.8, 1), ht-Ni<sub>4</sub>Fe<sub>1</sub> LDH and ht-LDH/BTC.

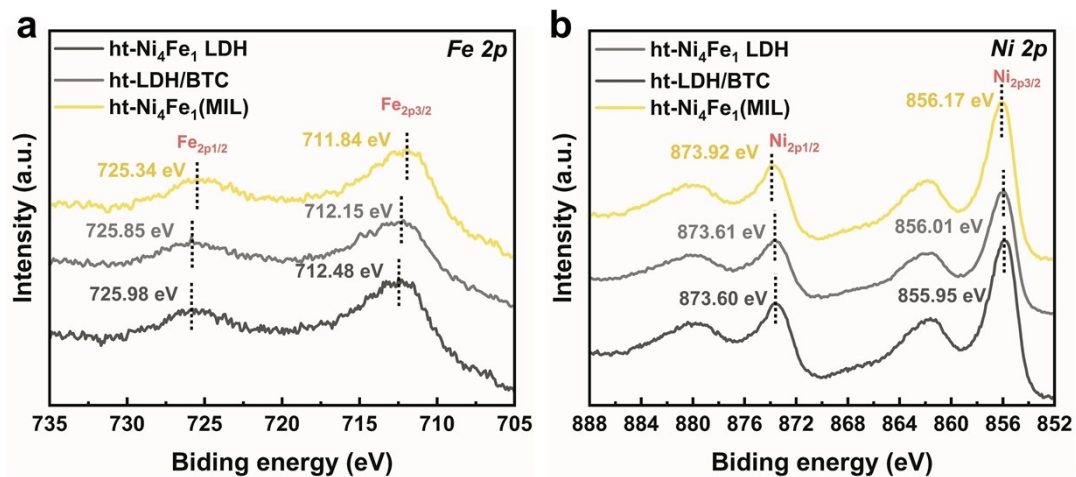

Figure S13. (a) Fe 2p and (d) Ni 2p fine XPS spectra ht-Ni<sub>4</sub>Fe<sub>1</sub>(MIL), ht-Ni<sub>4</sub>Fe<sub>1</sub> LDH and ht-LDH/BTC.

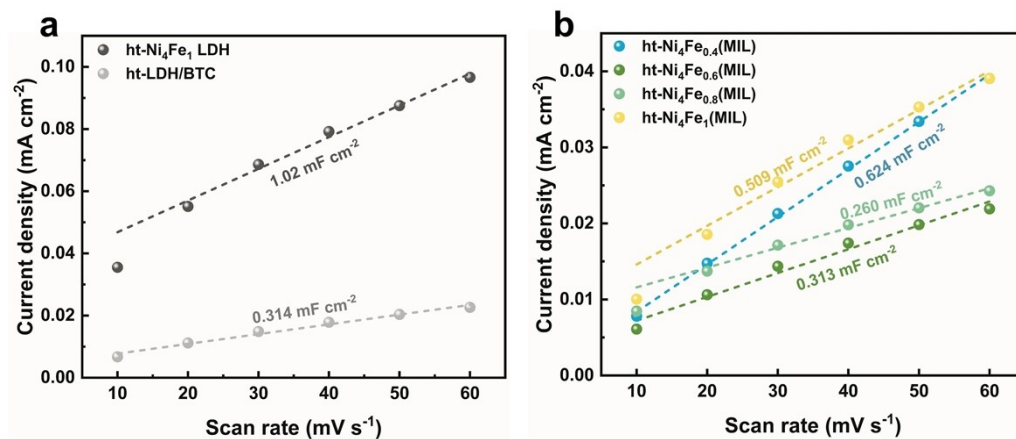

**Figure S14.** Double layer capacitances of (a) ht-Ni<sub>4</sub>Fe<sub>1</sub> LDH, ht-LDH/BTC and (b) ht-Ni<sub>4</sub>Fe<sub>n</sub>(MIL) (n= 0.4, 0.6, 0.8, 1) estimated by CV at various scan rates.

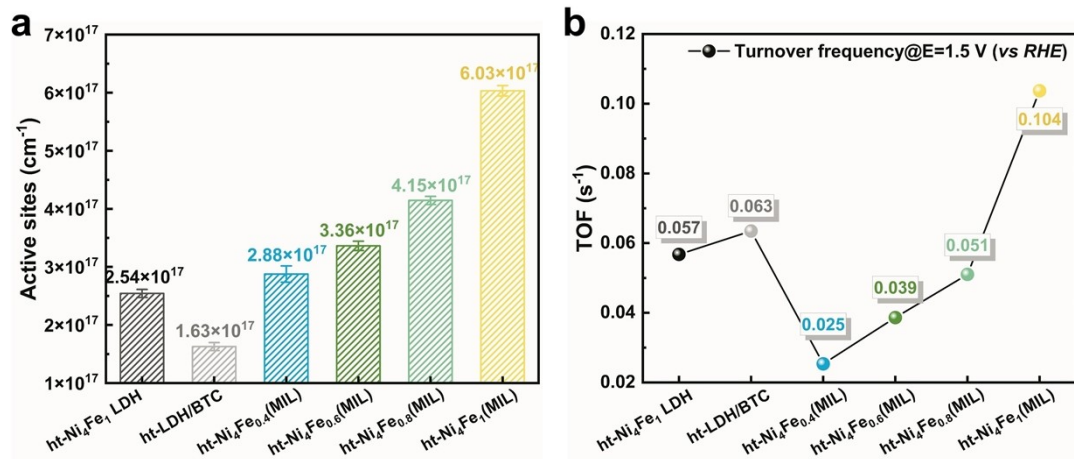

**Figure S15.** (a) Active sites of prepared catalyst electrodes and (b) Turnover frequency at 1.5 V (vs RHE).



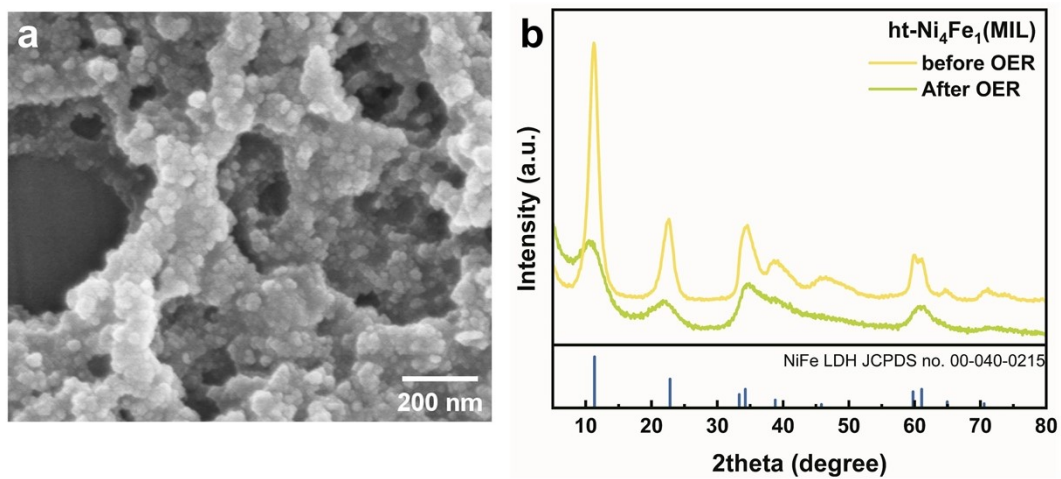

**Figure S16.** (a) SEM image of ht-Ni<sub>4</sub>Fe<sub>1</sub>(MIL) and (b) XRD pattern of ht-Ni<sub>4</sub>Fe<sub>1</sub>(MIL) before and after OER.

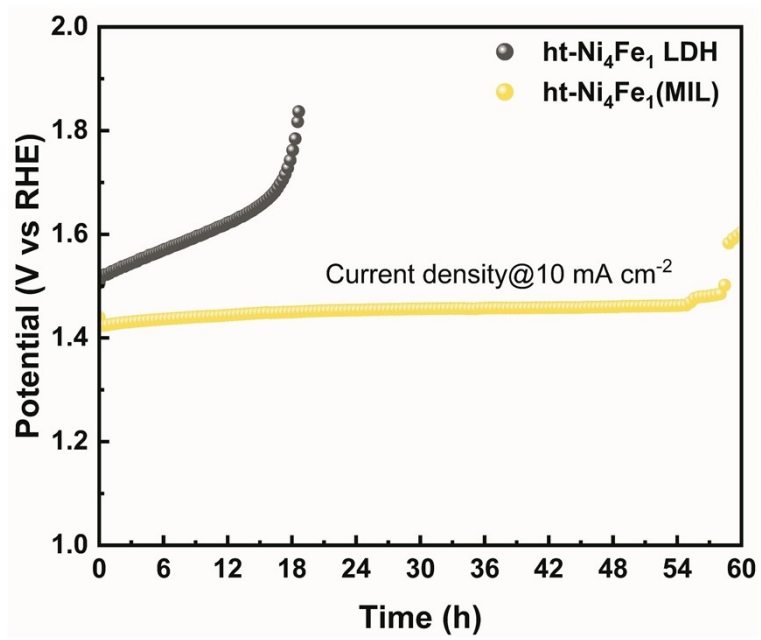

Figure S17. Chronopotentiometry of ht-Ni<sub>4</sub>Fe<sub>1</sub> LDH and ht-Ni<sub>4</sub>Fe<sub>1</sub>(MIL).

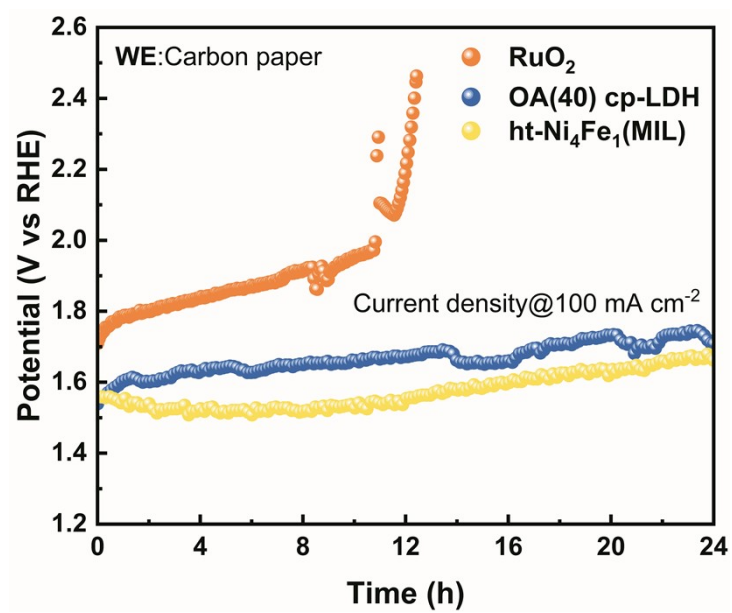

**Figure S18.** Chronopotentiometry at 100 mA cm<sup>-2</sup> of RuO<sub>2</sub>, cp-OA(40) LDH and ht-Ni<sub>4</sub>Fe<sub>1</sub>(MIL).
